# Supplementary material for: Betaine supplementation alleviates dextran sulfate sodium-induced colitis via regulating the inflammatory response, enhancing the intestinal barrier, and altering gut microbiota
Source: Royal Society of Chemistry journal article supplement (doi:10.1039/d2fo02942a), 2022-01-01

All of the western blot bands in this document are from animal tissues. It is worth nothing that we put two gels on one NC membranes for exposure in this experiment. In particular, we did not get very good bands of IL-6 and claudin, although we have experimented many times or changed antibodies, which may be due to the cells in the tissue are complex or the protein content is low.

Raw images of Western blot were as follows:

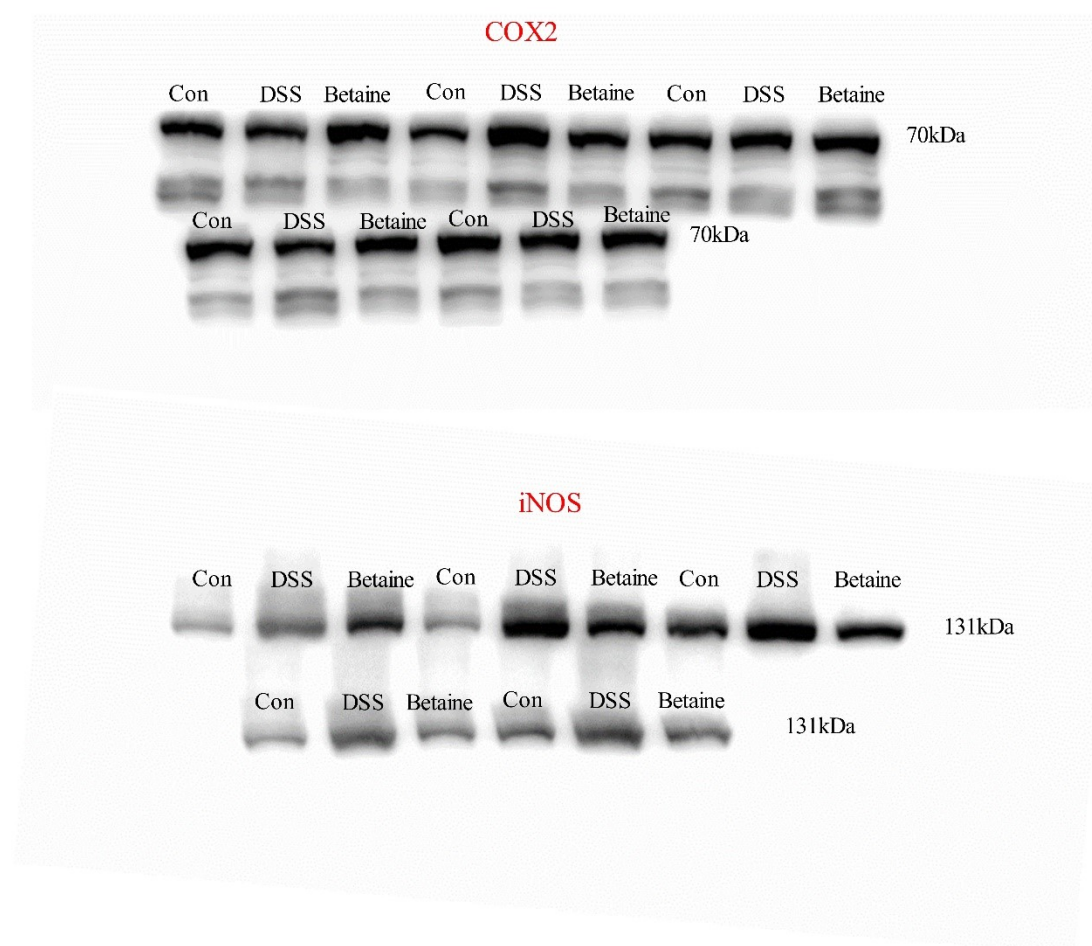

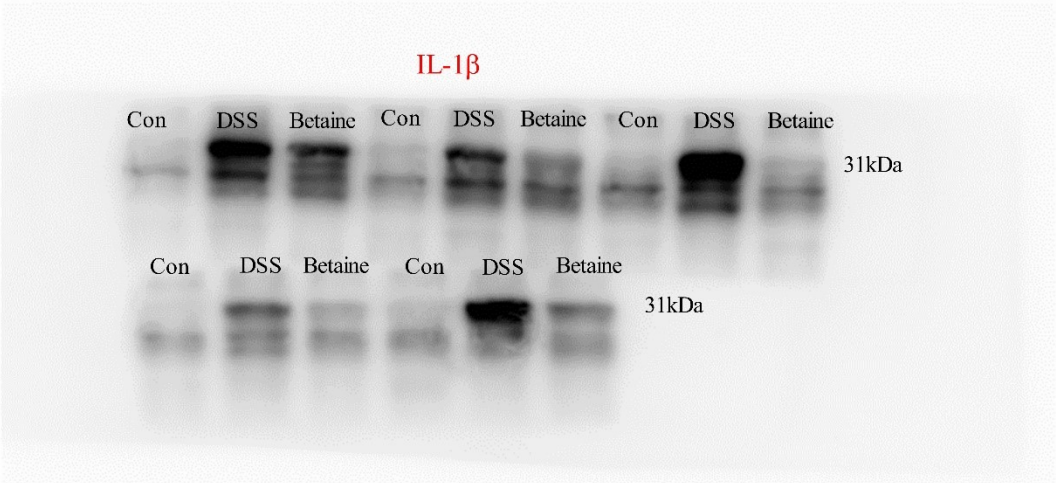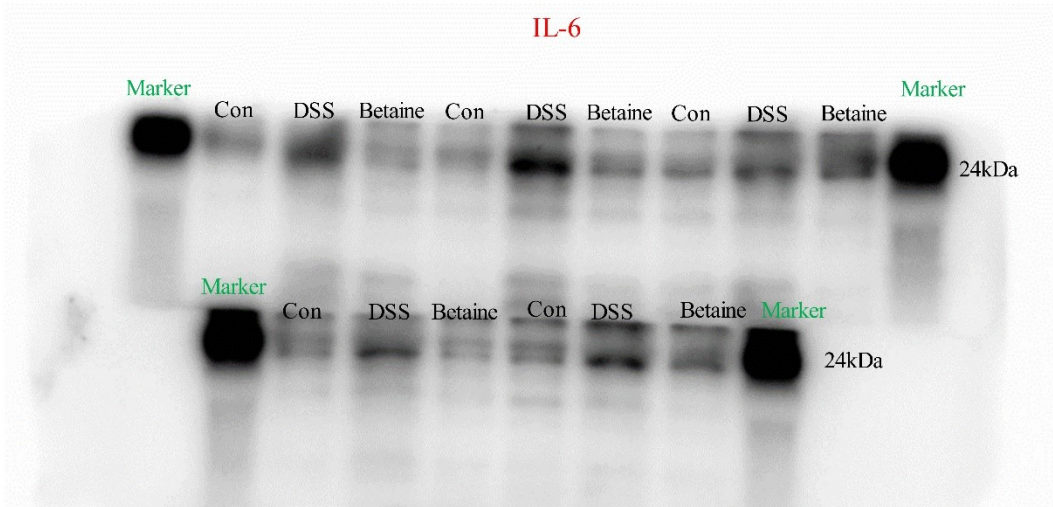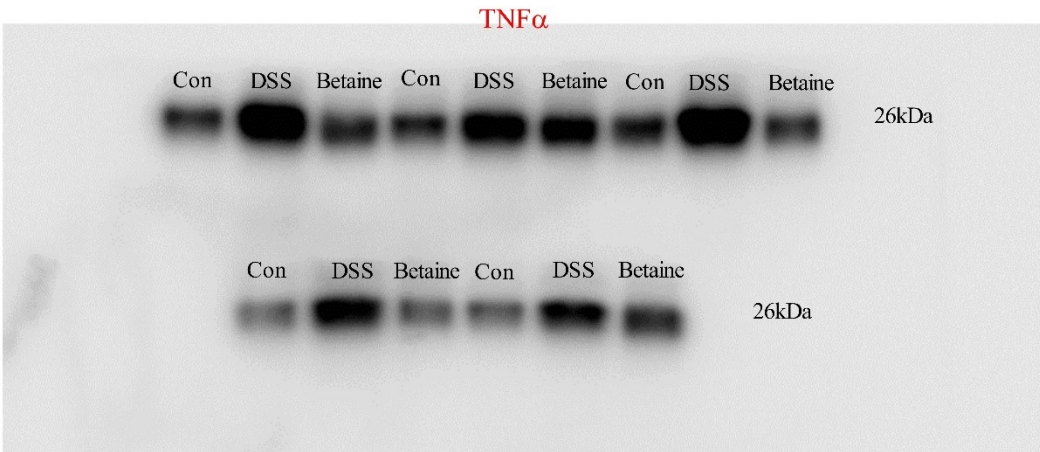

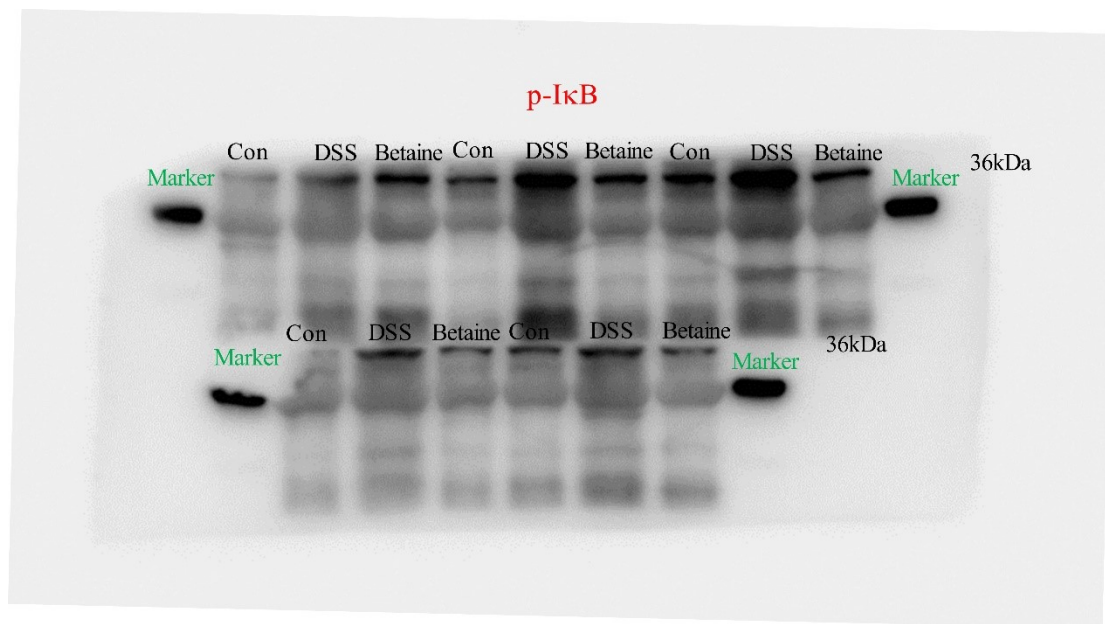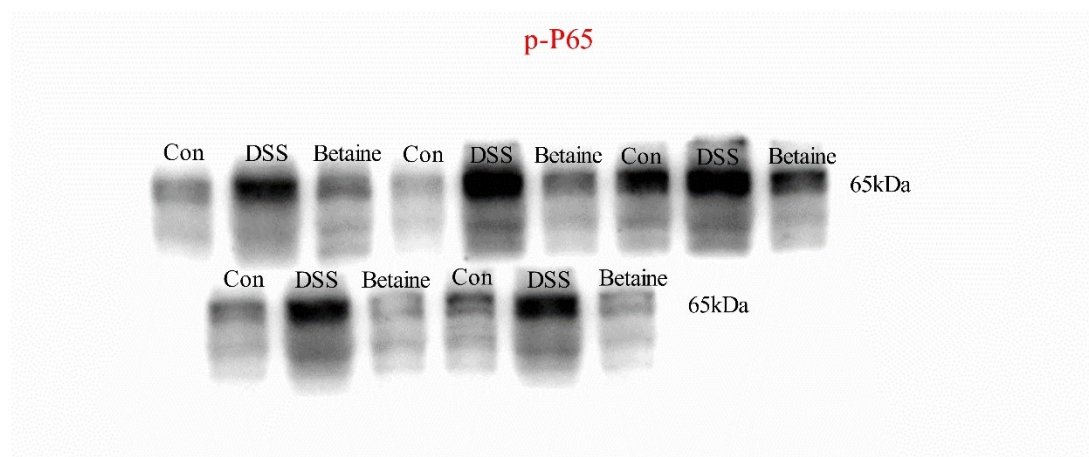



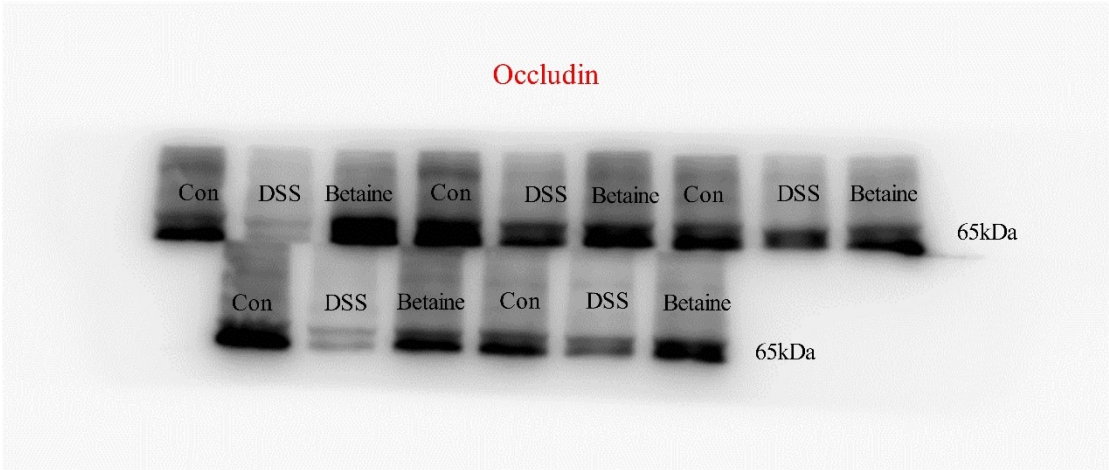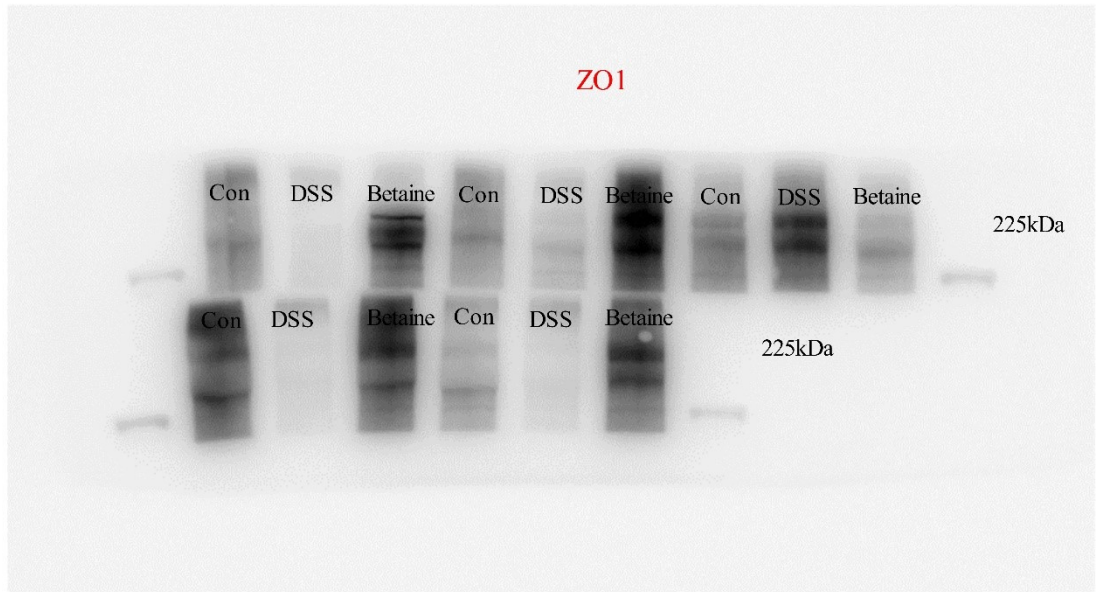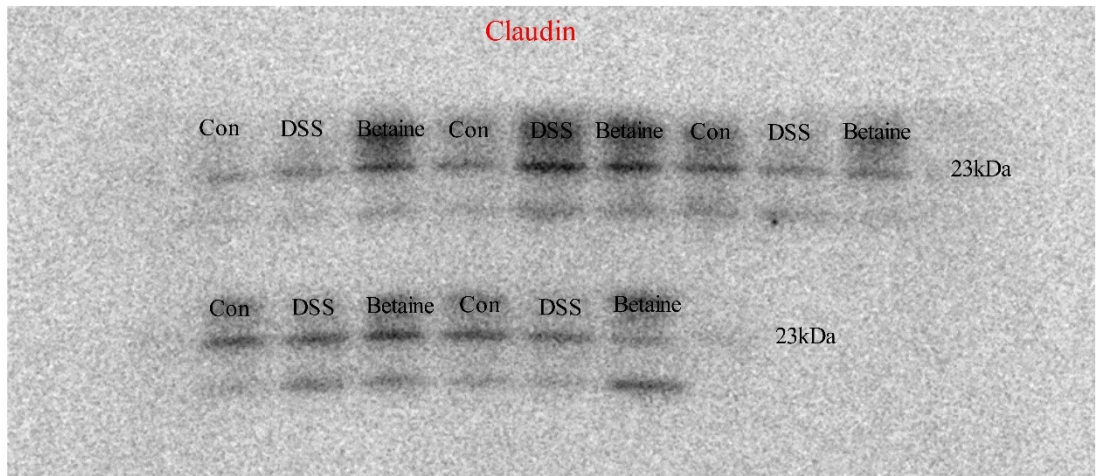

Supplement: d2fo02942a1.pdf [file d2fo02942a1.pdf]
