# Supplementary material for: Betaine supplementation alleviates dextran sulfate sodium-induced colitis via regulating the inflammatory response, enhancing the intestinal barrier, and altering gut microbiota
Source: Royal Society of Chemistry journal article supplement (doi:10.1039/d2fo02942a), 2022-01-01

All of the western blot bands in this document are from Caco-2 cells. Samely, we didi not get get very good bands of IL-6.

Raw images of Western blot were as follows:

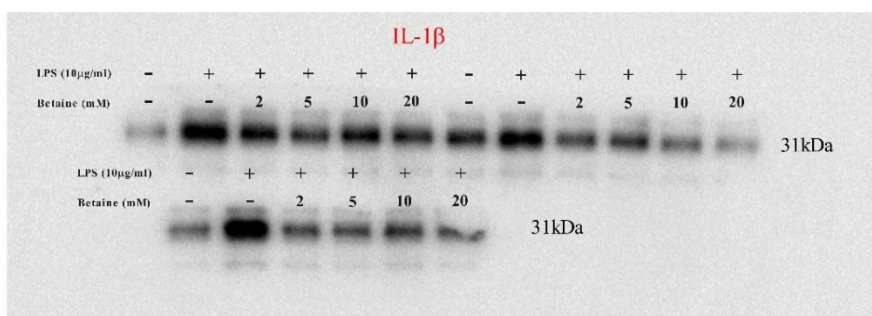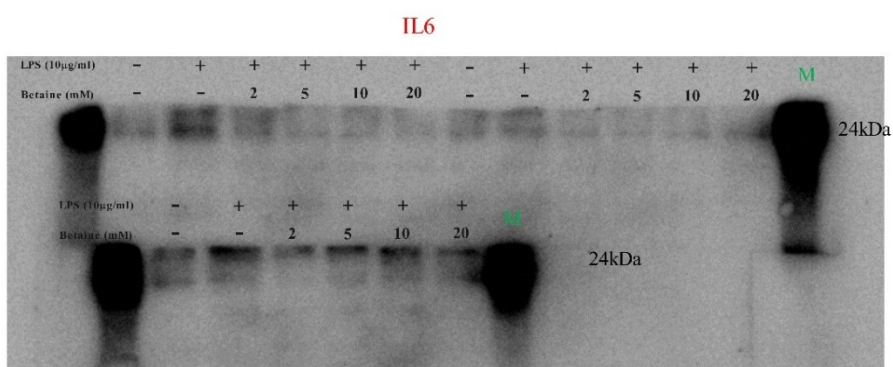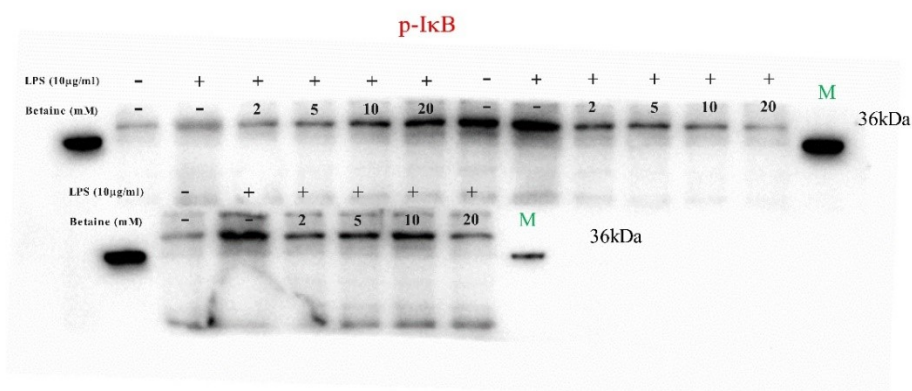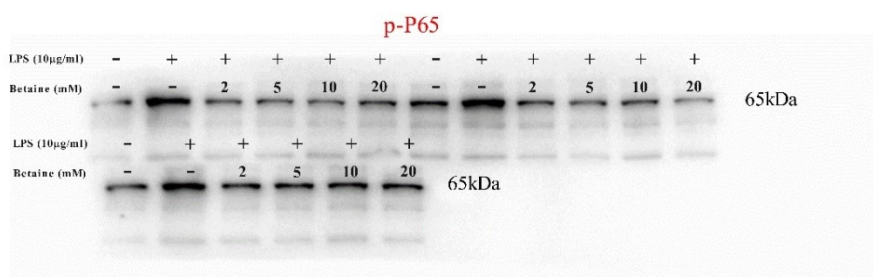

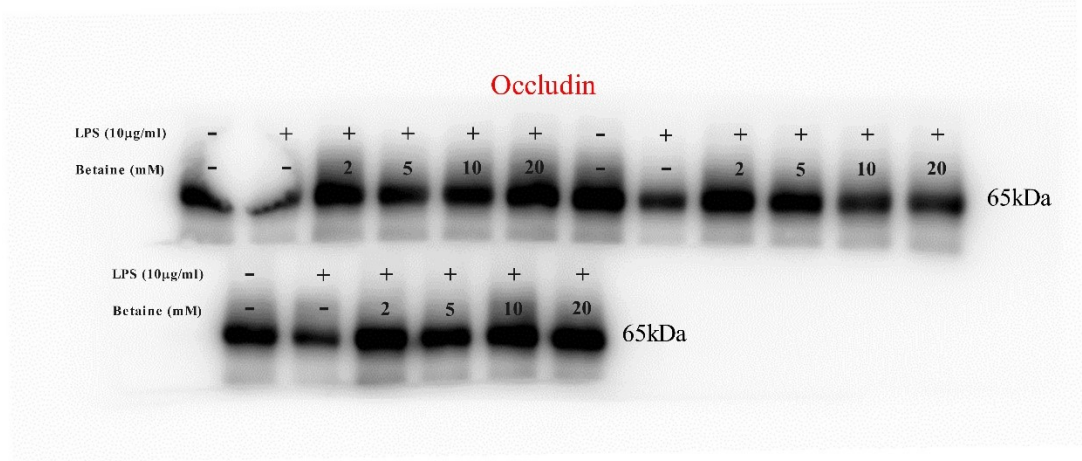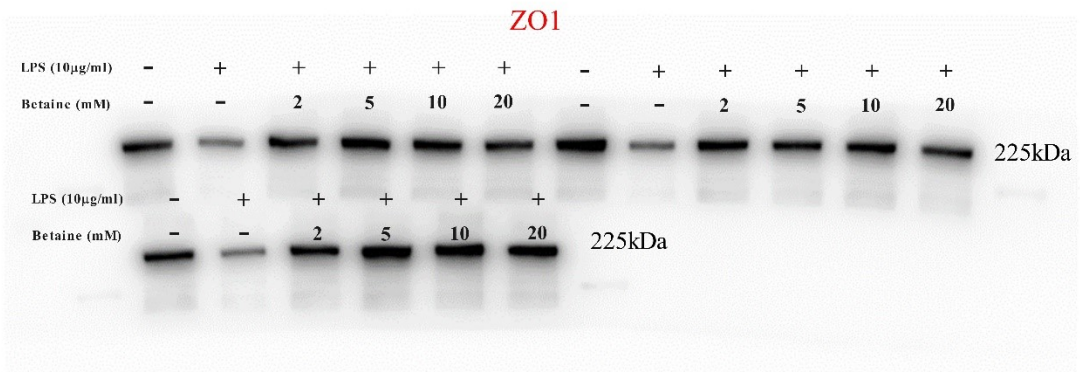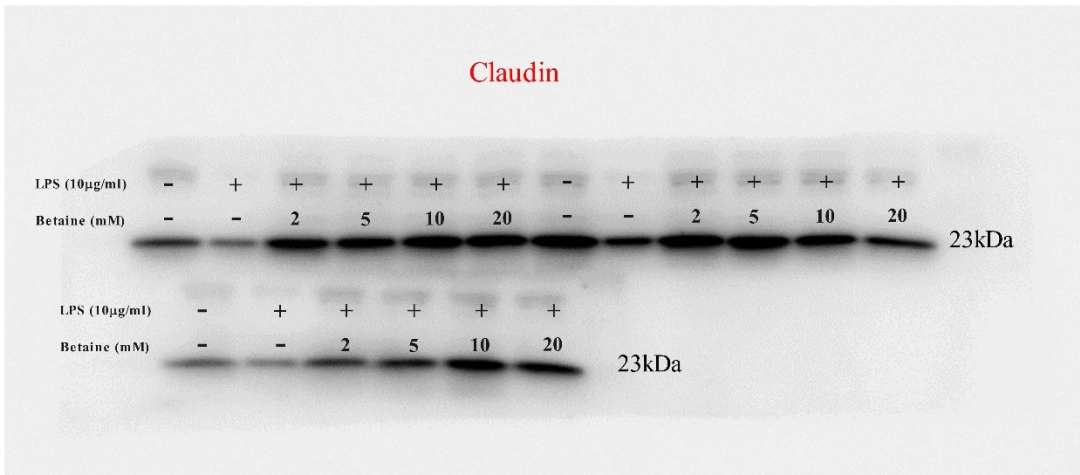

Supplement: d2fo02942a2.pdf [file d2fo02942a2.pdf]
